# Supplementary material
Source: publisher figshare collection journal article supplement (https://sage.figshare.com/ndownloader/files/13113209)
Supplement: Supplementary file 1 [file 13113209]

**eTable 1.** Mobile Application Use among Kidney Transplant Recipients Survey Items

| Survey items                             |
|------------------------------------------|
| 1. Ownership of a smartphone             |
| 2. Length of time for ownership          |
| 3. Use of Internet                       |
| 4. Health information accessed           |
| 5. Alarm use                             |
| 6. Use of mobile apps                    |
| 7. Knowledge to download                 |
| 8. Location of downloading               |
| 9. Comfort                               |
| 10. Barriers or challenges               |
| 11. Types used                           |
| 12. Health apps use                      |
| 13. Type of health app                   |
| 14. Name of the Health apps              |
| 15. Use of Facebook                      |
| 16. Use of Twitter                       |
| 17. Use of tracking features             |
| 18. Ability to improve comfort of use    |
| 19. Mobile apps to manage overall health |
